# Supplementary material for: Global population structure and adaptive evolution of aflatoxin‐producing fungi
Source: PubMed Central journal article supplement (PMC5677503; doi:10.1002/ece3.3464), 2017-09-30
Supplement: ECE3-7-9179-s003.pdf [file ECE3-7-9179-s003.pdf]

***afIM/afIN***  
1438 MP Trees  
CI = 0.6440

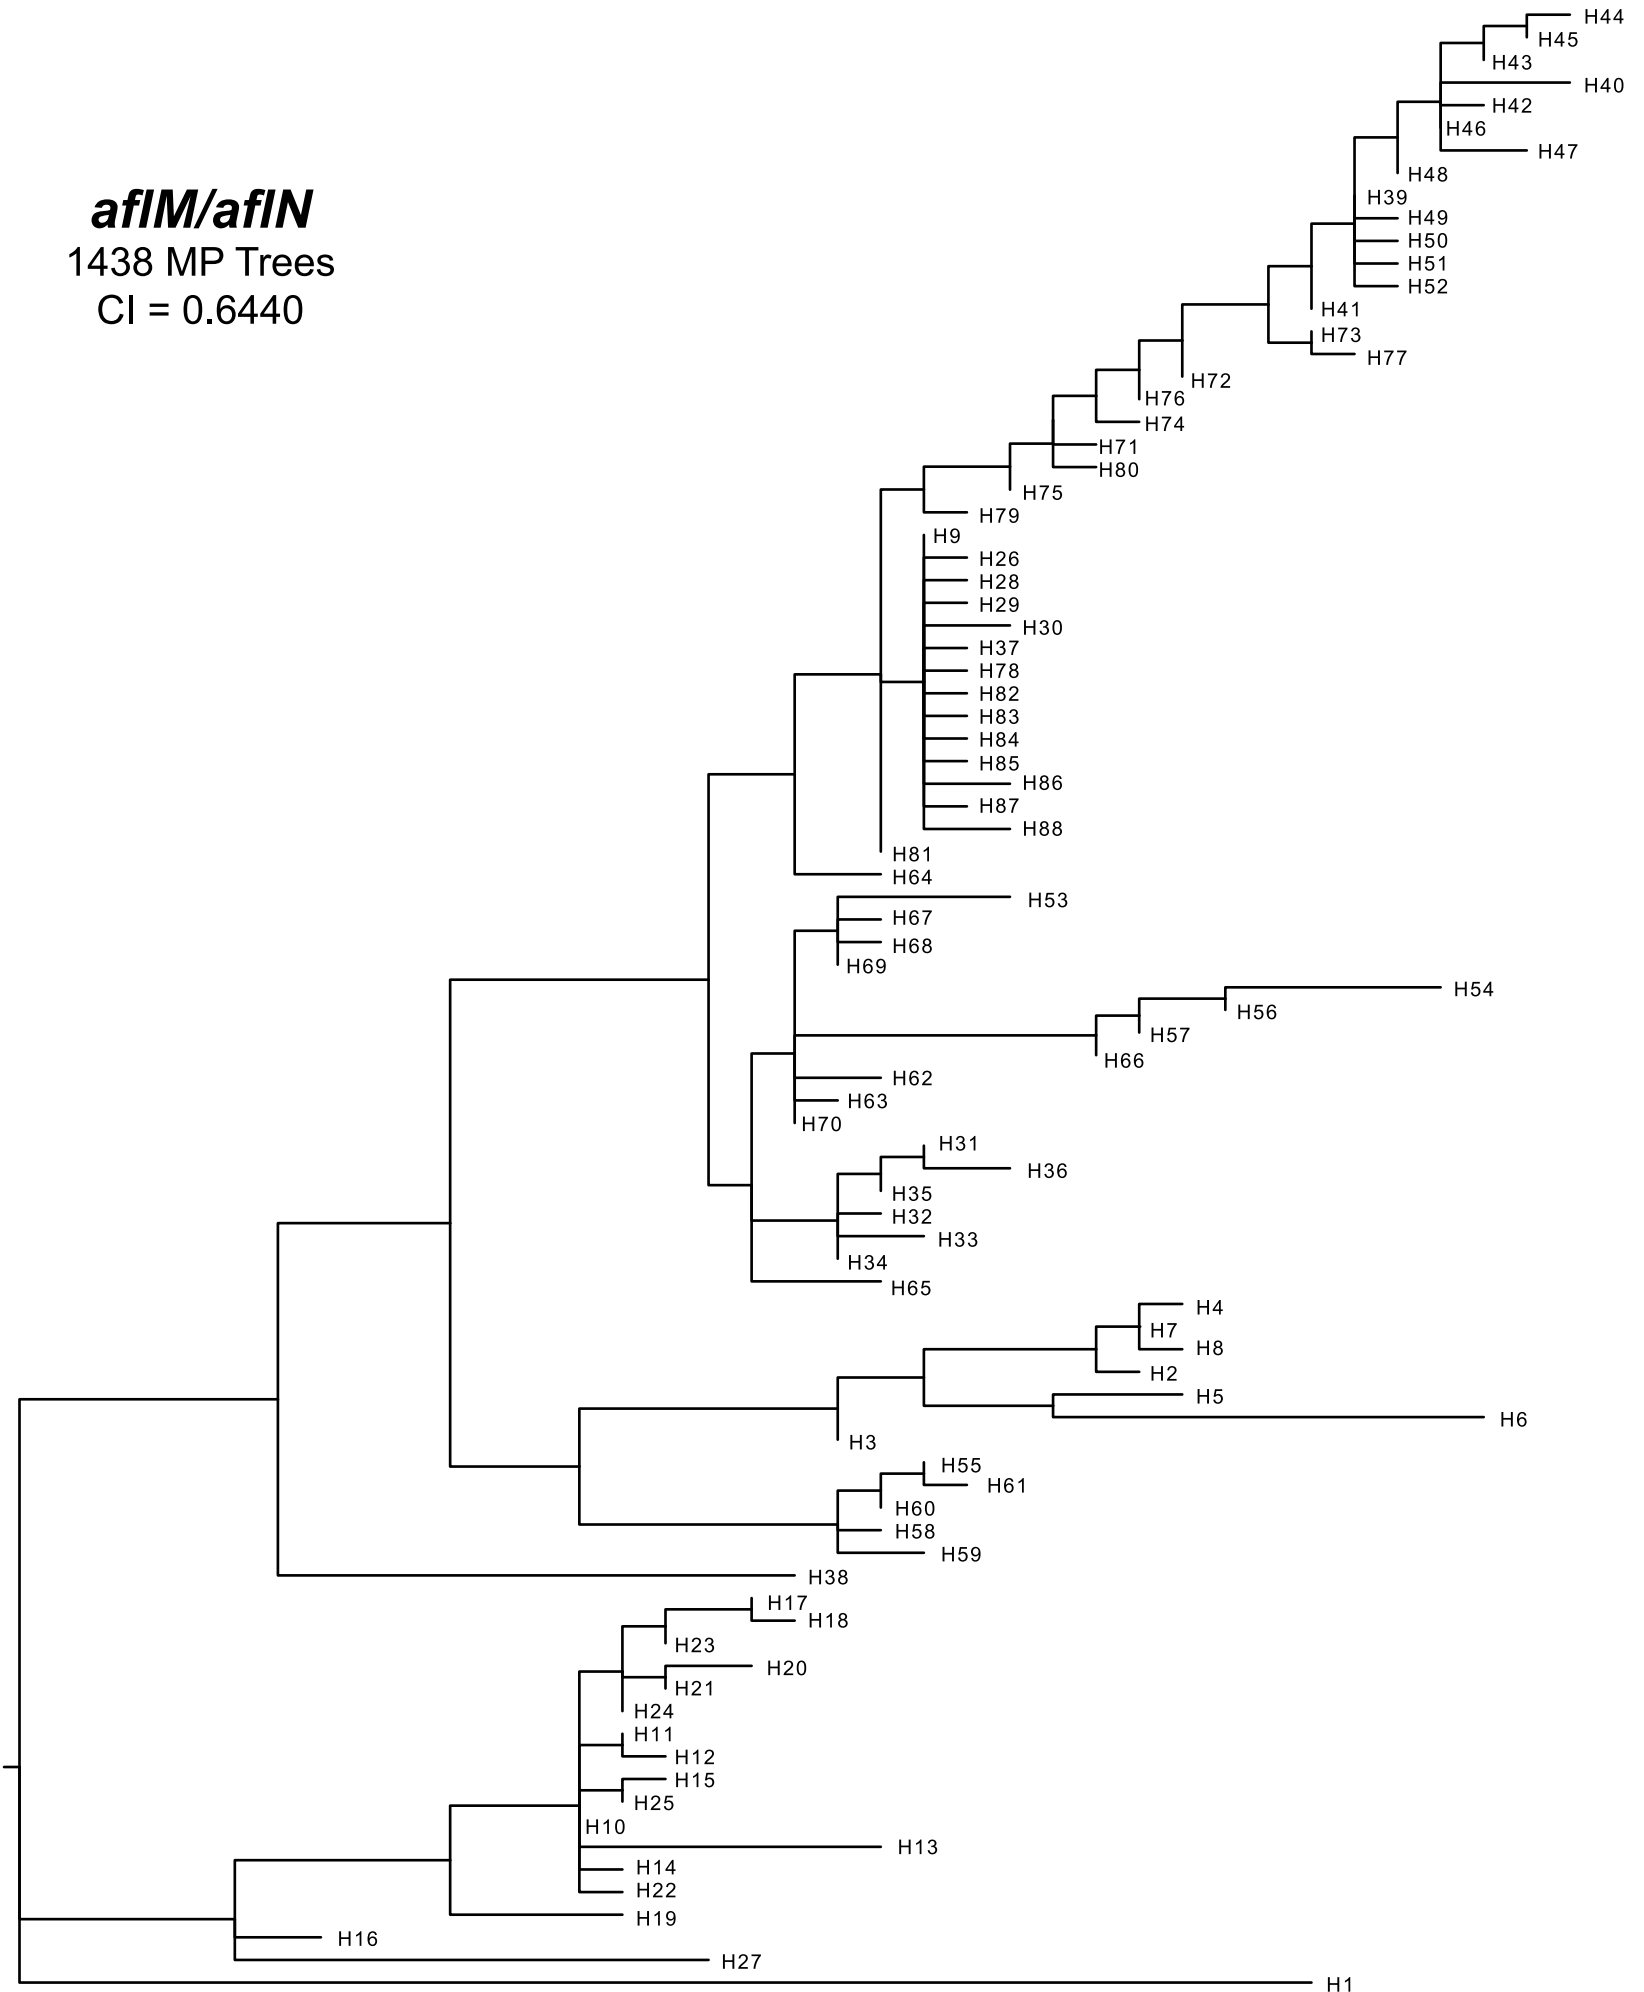

4.0
