# Supplementary material for: Global population structure and adaptive evolution of aflatoxin‐producing fungi
Source: PubMed Central journal article supplement (PMC5677503; doi:10.1002/ece3.3464), 2017-09-30
Supplement: ECE3-7-9179-s007.pdf [file ECE3-7-9179-s007.pdf]

# Maximum Likelihood Phylogeny

# Principal Component Analysis

## MAT1-2

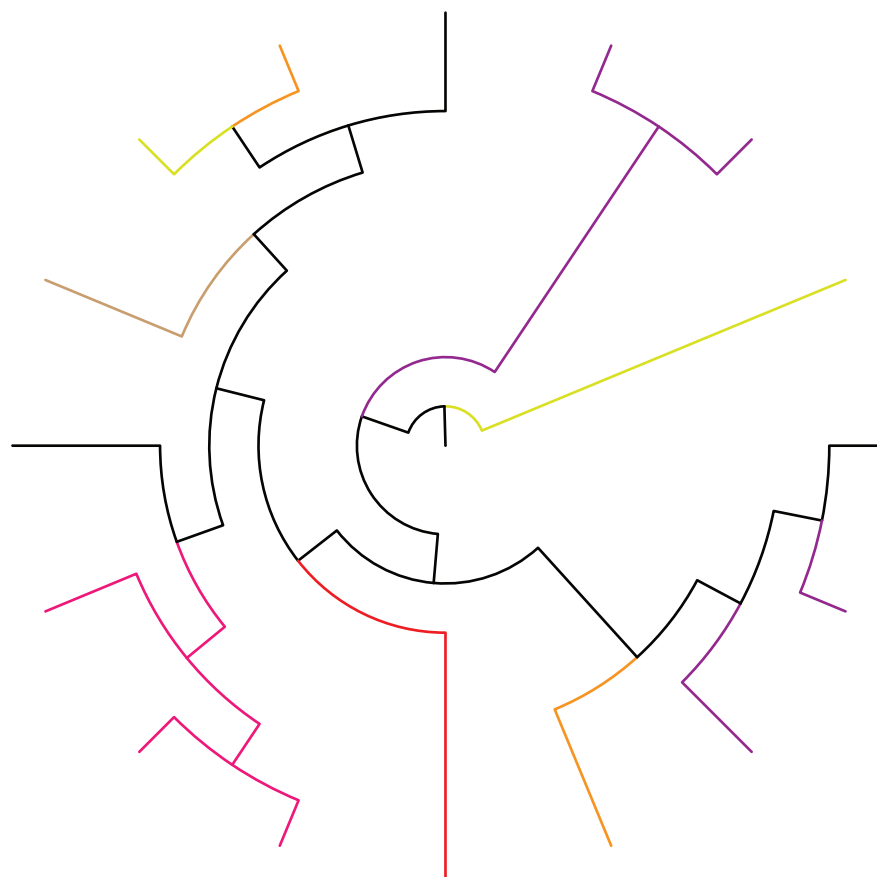

- △ Argentina
- + Australia
- Benin
- × India
- United States

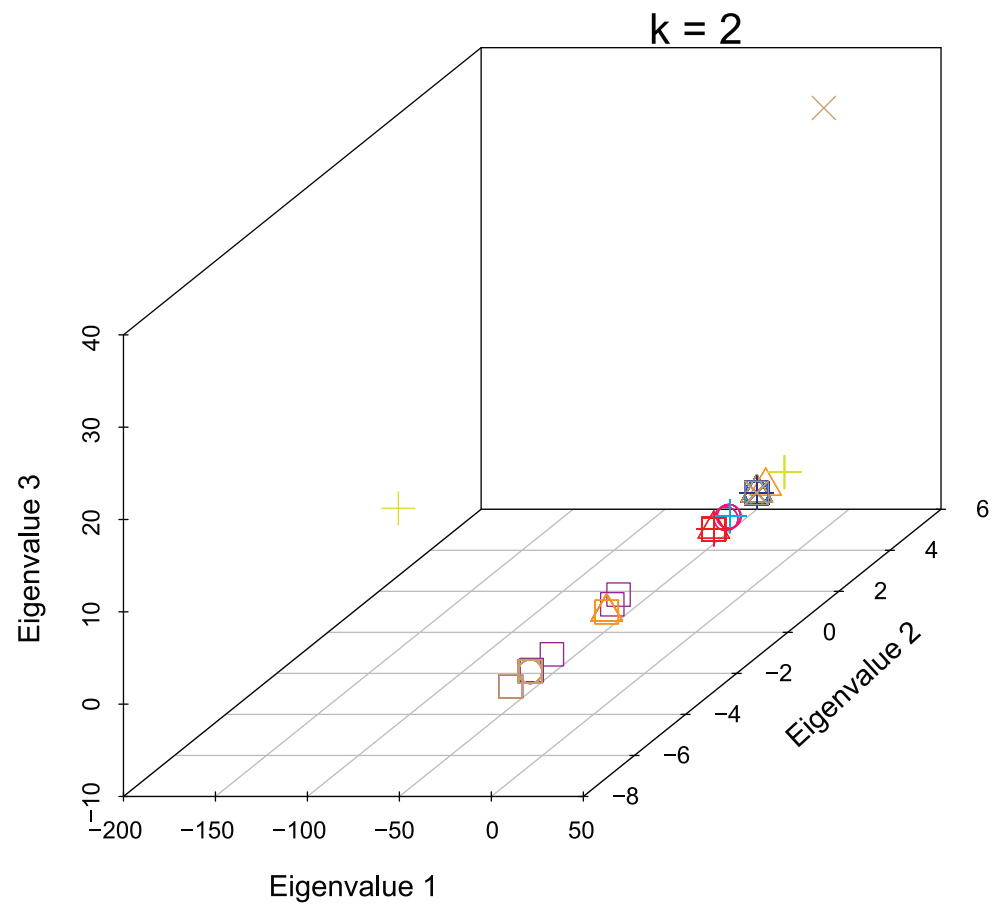

- A. alliaceus*
- A. caelatus*
- A. flavus* L
- A. flavus* S<sub>B</sub>
- A. flavus* S<sub>BG</sub>
- A. nomius*
- A. oryzae*
- A. parasiticus*
- A. tamarii*
