# Supplementary material for: Global population structure and adaptive evolution of aflatoxin‐producing fungi
Source: PubMed Central journal article supplement (PMC5677503; doi:10.1002/ece3.3464), 2017-09-30

# Maximum Likelihood Phylogeny

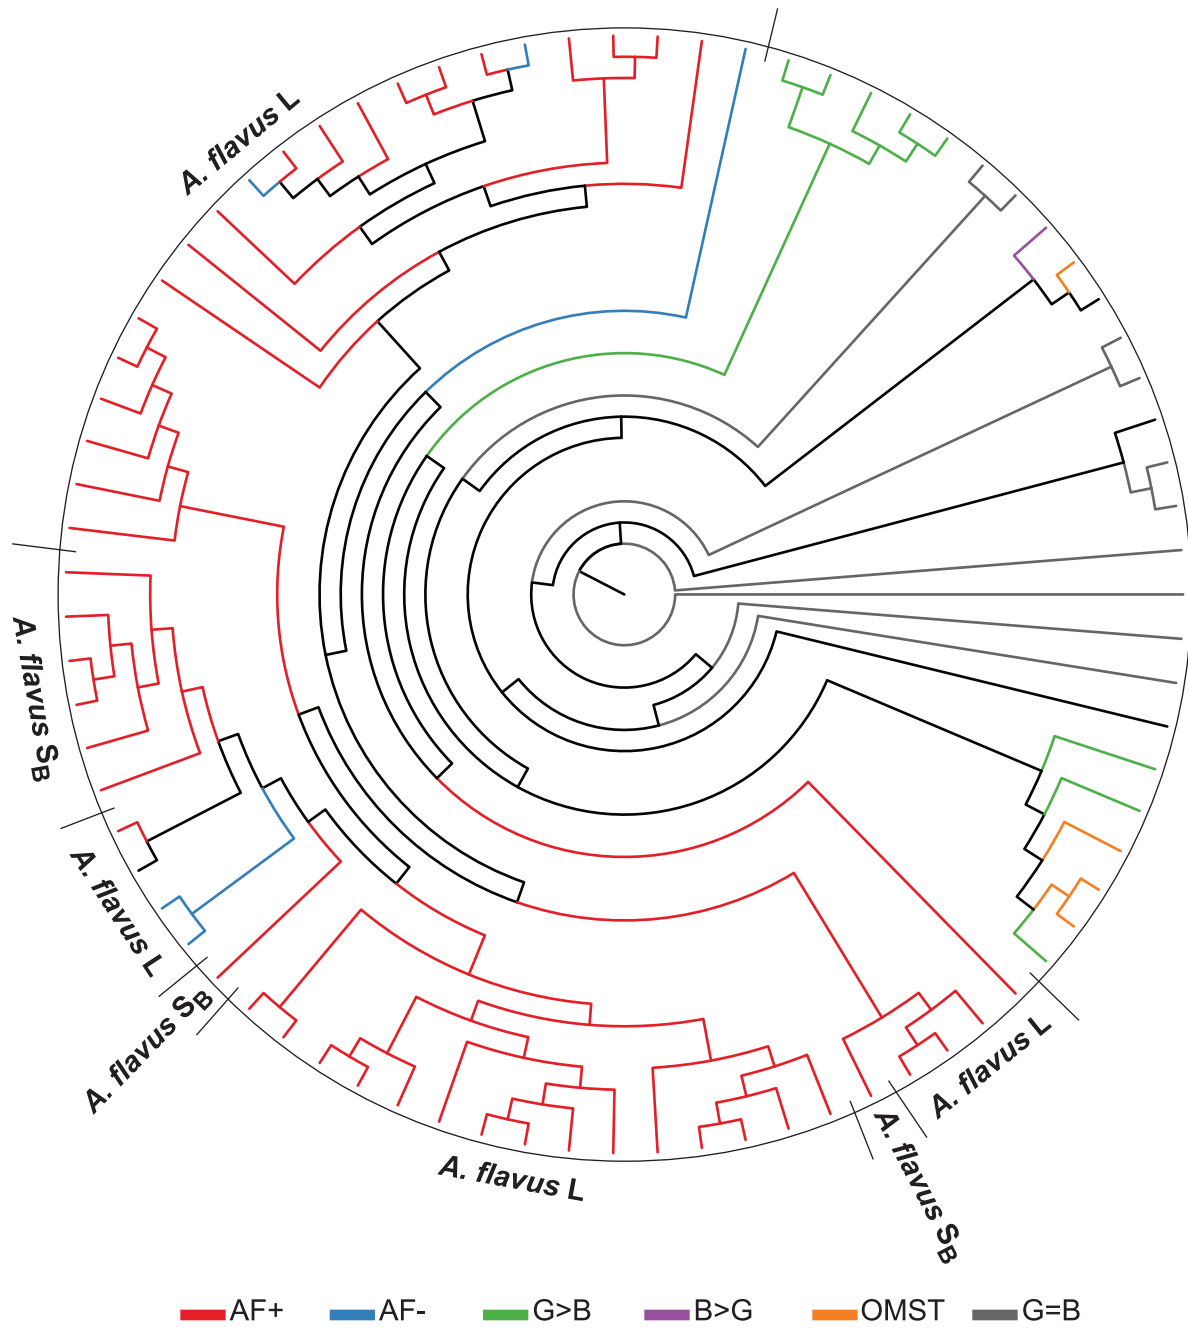

# Principal Component Analysis

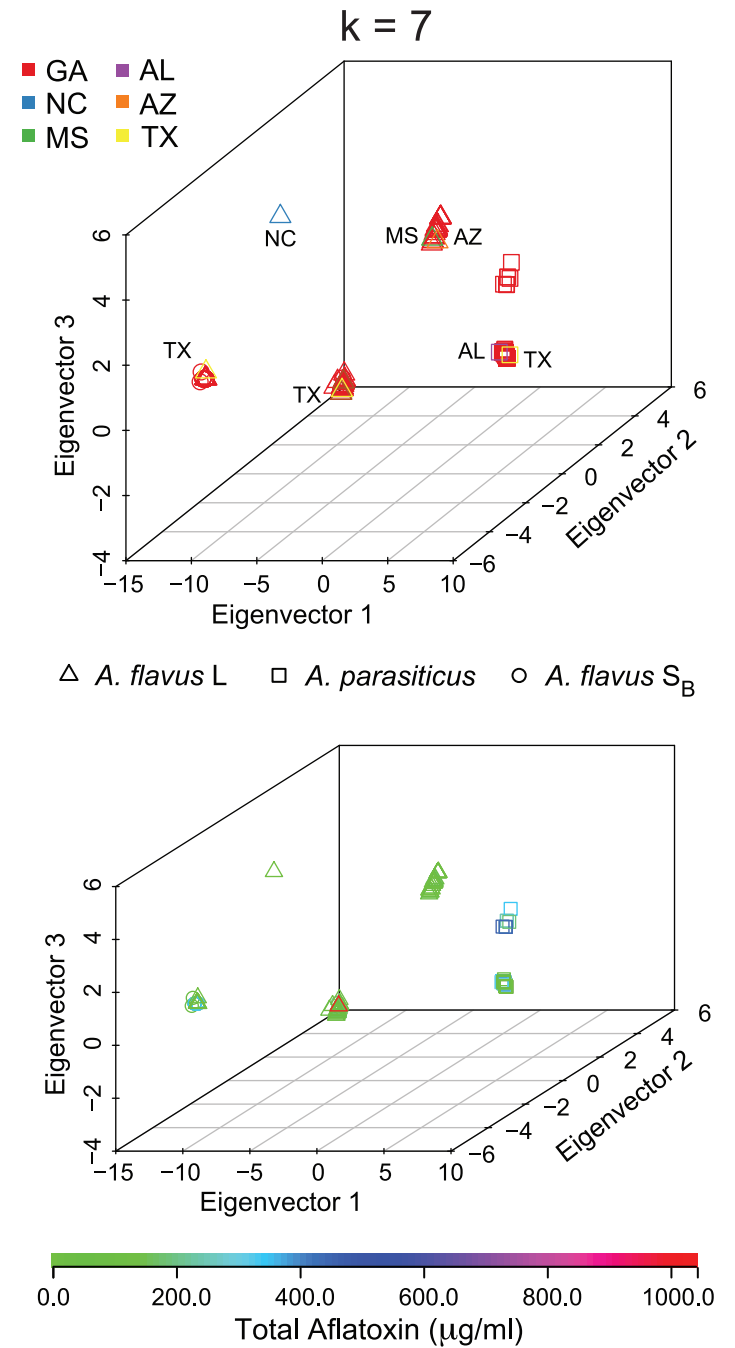

Supplement: ECE3-7-9179-s008.pdf [file ECE3-7-9179-s008.pdf]
