# Supplementary material for: Global population structure and adaptive evolution of aflatoxin‐producing fungi
Source: PubMed Central journal article supplement (PMC5677503; doi:10.1002/ece3.3464), 2017-09-30
Supplement: ECE3-7-9179-s009.pdf [file ECE3-7-9179-s009.pdf]

# Maximum Likelihood Phylogeny

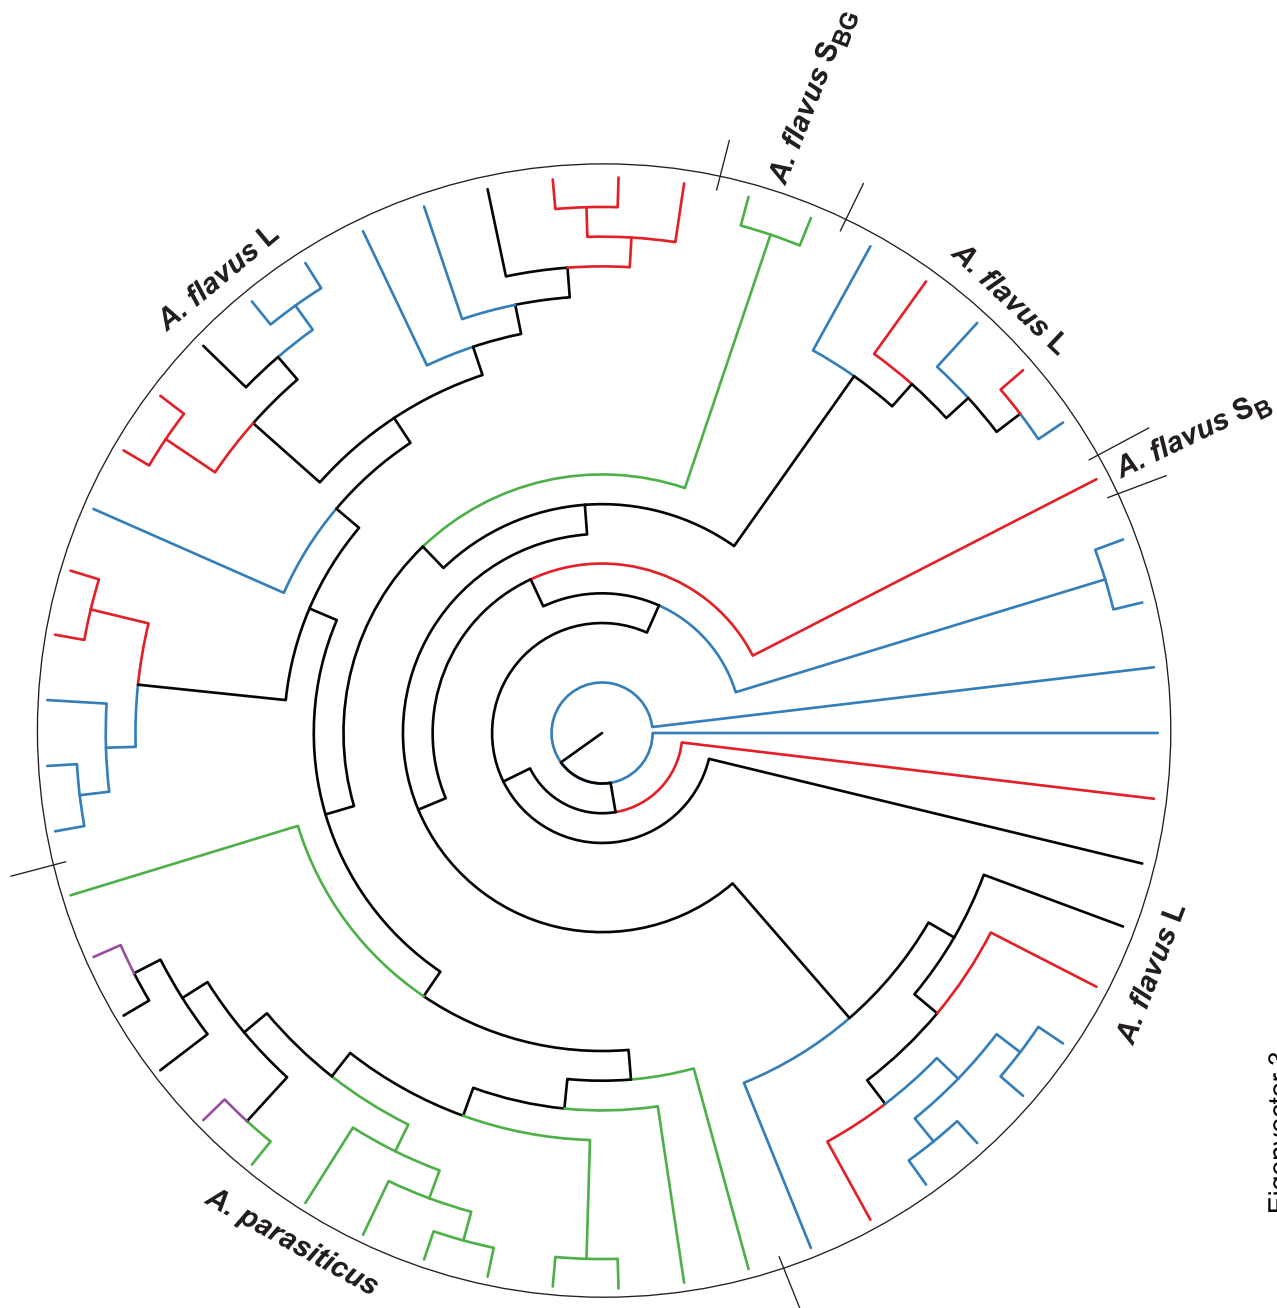

■ AF+   
 ■ AF-   
 ■ G>B   
 ■ B>G   
 ■ OMST   
 ■ G=B

# Principal Component Analysis

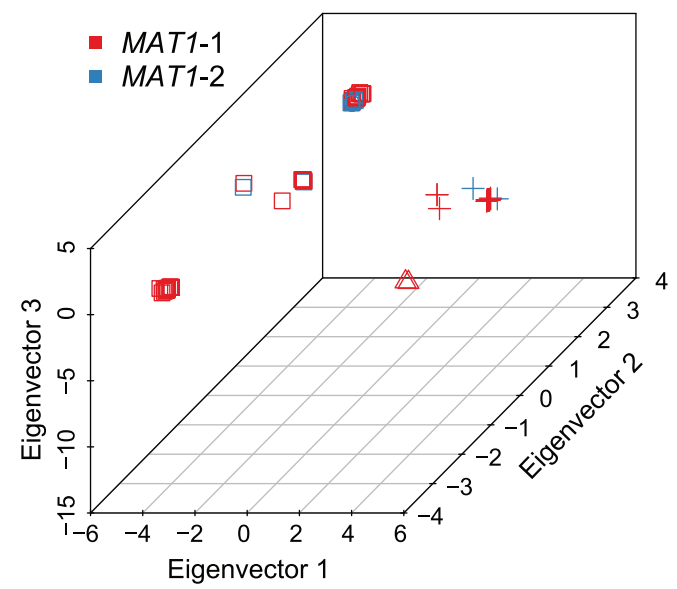

*A. flavus* L   
  *A. flavus* SBG  
 *A. flavus* SB   
 + *A. parasiticus*

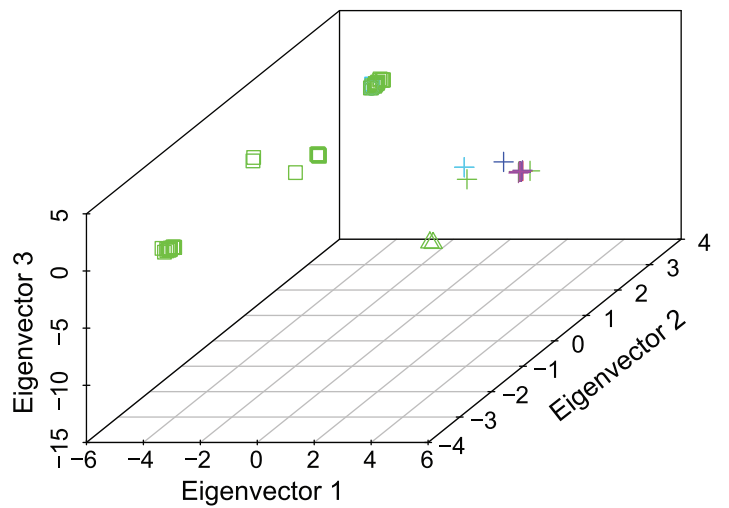

0.0    100.0    200.0    300.0    400.0    500.0    582.7  
 Total Aflatoxin (µg/ml)
